# Supplementary material
Source: bioRxiv or medRxiv preprint supplement (https://medrxiv.org/highwire/filestream/83606/field_highwire_adjunct_files/0/2020.05.19.20107078-1.pdf)
Supplement: Supplementary file [file 2020.05.19.20107078-1.pdf]

## Supplementary Information

**Supplementary Table 01:** Computational language analysis applied to dream reports. Raw data from participants that reported a dream before the COVID19 outbreak (identified as controls – Ctr) and after the announcement of the COVID19 pandemic by WHO (identified as subjects – Sub). Emotional analysis computed as the proportion of words with specific content; structural analysis computed as the number of nodes in the LCC or LSC (connected components of speech graphs) or the word count, and semantic analysis computed as average cosine between the words on dreams reports and the probe words identified on top. For dream reports from the pandemic period, all the measures were average per subject if the same participant reported more than one dream report at the follow-up. For more details, read Methods.

| ID      | Emotional Analysis |          |         |       |         | Structural Analysis |       |         | Semantic Similarity Analysis |           |         |        |       |      |
|---------|--------------------|----------|---------|-------|---------|---------------------|-------|---------|------------------------------|-----------|---------|--------|-------|------|
|         | Positive           | Negative | Anxiety | Anger | Sadness | LCC                 | LSC   | WC      | Contamination                | Cleanness | Disease | Health | Death | Life |
| Sub001  | 3.60               | 1.77     | 0.48    | 0.70  | 0.54    | 25.47               | 18.18 | 120.33  | 0.01                         | 0.00      | 0.02    | 0.00   | 0.01  | 0.06 |
| Sub002  | 3.31               | 0.92     | 0.18    | 0.18  | 0.00    | 24.01               | 18.63 | 506.00  | 0.01                         | 0.00      | 0.01    | 0.00   | 0.00  | 0.08 |
| Sub003  | 3.38               | 2.08     | 0.15    | 0.72  | 0.95    | 24.68               | 18.50 | 685.50  | 0.01                         | 0.00      | 0.02    | 0.00   | 0.01  | 0.08 |
| Sub004  | 3.83               | 1.29     | 0.41    | 0.32  | 0.38    | 24.30               | 19.03 | 177.92  | 0.00                         | 0.00      | 0.02    | 0.00   | 0.01  | 0.08 |
| Sub005  | 2.25               | 0.58     | 0.00    | 0.29  | 0.00    | 24.82               | 19.41 | 235.50  | 0.00                         | 0.00      | 0.02    | 0.01   | 0.01  | 0.12 |
| Sub006  | 4.60               | 1.58     | 0.19    | 1.01  | 0.86    | 24.35               | 18.81 | 641.67  | 0.00                         | 0.00      | 0.02    | 0.01   | 0.01  | 0.07 |
| Sub007  | 3.60               | 3.09     | 1.20    | 0.55  | 1.80    | 24.87               | 17.34 | 165.67  | 0.03                         | 0.01      | 0.02    | 0.01   | 0.01  | 0.07 |
| Sub008  | 2.79               | 0.88     | 0.21    | 0.00  | 0.67    | 24.51               | 19.03 | 149.40  | 0.00                         | 0.00      | 0.01    | 0.00   | 0.01  | 0.06 |
| Sub009  | 4.18               | 2.28     | 0.40    | 0.58  | 0.84    | 24.99               | 18.42 | 162.40  | 0.01                         | 0.00      | 0.02    | 0.00   | 0.01  | 0.09 |
| Sub010  | 3.95               | 2.63     | 1.32    | 1.32  | 0.00    | 27.83               | 17.17 | 31.00   | 0.01                         | 0.00      | 0.02    | 0.01   | 0.02  | 0.03 |
| Sub011  | 6.52               | 0.54     | 0.00    | 0.29  | 0.00    | 25.57               | 19.22 | 117.00  | 0.00                         | 0.00      | 0.02    | 0.01   | 0.01  | 0.06 |
| Sub012  | 3.61               | 3.92     | 0.00    | 0.31  | 3.31    | 22.53               | 18.11 | 247.50  | 0.00                         | 0.00      | 0.01    | 0.01   | 0.00  | 0.06 |
| Sub013  | 2.44               | 2.44     | 1.22    | 1.22  | 0.00    | 24.02               | 12.33 | 74.00   | 0.06                         | 0.00      | 0.02    | 0.01   | 0.03  | 0.04 |
| Sub014  | 2.95               | 1.47     | 0.00    | 1.05  | 0.63    | 24.88               | 18.32 | 457.00  | 0.01                         | 0.00      | 0.02    | 0.02   | 0.00  | 0.05 |
| Sub015  | 4.54               | 1.08     | 0.28    | 0.46  | 0.16    | 24.38               | 19.34 | 206.50  | 0.01                         | 0.00      | 0.01    | 0.01   | 0.01  | 0.08 |
| Sub016  | 2.25               | 1.40     | 0.00    | 0.84  | 0.56    | 25.41               | 18.78 | 339.00  | 0.01                         | 0.00      | 0.01    | 0.00   | 0.01  | 0.07 |
| Sub017  | 3.22               | 0.96     | 0.21    | 0.22  | 0.42    | 23.65               | 18.46 | 330.53  | 0.00                         | 0.00      | 0.01    | 0.01   | 0.01  | 0.05 |
| Sub018  | 2.99               | 0.75     | 0.00    | 0.75  | 0.00    | 24.84               | 17.65 | 124.00  | 0.01                         | 0.00      | 0.06    | 0.05   | 0.01  | 0.04 |
| Sub019  | 3.18               | 1.19     | 0.32    | 0.57  | 0.38    | 24.61               | 18.50 | 389.83  | 0.00                         | 0.00      | 0.02    | 0.01   | 0.01  | 0.09 |
| Sub020  | 5.50               | 1.73     | 0.00    | 0.86  | 0.86    | 24.98               | 19.03 | 76.00   | 0.01                         | 0.00      | 0.02    | 0.00   | 0.01  | 0.09 |
| Sub021  | 3.35               | 0.68     | 0.11    | 0.11  | 0.06    | 24.36               | 17.18 | 1656.00 | 0.01                         | 0.00      | 0.01    | 0.01   | 0.01  | 0.08 |
| Sub022  | 2.67               | 2.19     | 1.10    | 0.16  | 0.63    | 25.58               | 19.08 | 228.50  | 0.01                         | 0.00      | 0.01    | 0.01   | 0.01  | 0.05 |
| Sub023  | 2.76               | 2.33     | 0.28    | 0.47  | 0.36    | 24.98               | 18.35 | 216.50  | 0.02                         | 0.01      | 0.01    | 0.01   | 0.00  | 0.06 |
| Sub024  | 4.12               | 1.19     | 0.28    | 0.30  | 0.37    | 24.88               | 17.50 | 329.00  | 0.01                         | 0.00      | 0.02    | 0.00   | 0.02  | 0.08 |
| Sub025  | 2.16               | 3.04     | 0.87    | 1.28  | 1.54    | 24.05               | 18.82 | 216.00  | 0.00                         | 0.00      | 0.03    | 0.01   | 0.02  | 0.08 |
| Sub026  | 2.98               | 1.34     | 0.30    | 0.14  | 0.64    | 24.78               | 18.25 | 294.80  | 0.01                         | 0.00      | 0.02    | 0.01   | 0.01  | 0.07 |
| Sub027  | 2.89               | 3.69     | 0.41    | 1.80  | 0.59    | 24.65               | 17.35 | 242.00  | 0.00                         | 0.00      | 0.01    | 0.00   | 0.00  | 0.08 |
| Sub028  | 4.74               | 2.82     | 0.14    | 0.37  | 2.19    | 24.98               | 18.17 | 454.64  | 0.01                         | 0.00      | 0.01    | 0.00   | 0.01  | 0.06 |
| Sub029  | 5.80               | 4.69     | 0.35    | 2.29  | 1.40    | 25.14               | 12.25 | 146.50  | 0.01                         | 0.00      | 0.01    | 0.01   | 0.02  | 0.08 |
| Sub030  | 3.66               | 1.40     | 0.46    | 0.42  | 0.49    | 23.35               | 18.02 | 471.23  | 0.01                         | 0.00      | 0.02    | 0.00   | 0.01  | 0.09 |
| Sub031  | 2.87               | 0.99     | 0.14    | 0.09  | 0.48    | 24.10               | 18.92 | 336.43  | 0.01                         | 0.00      | 0.01    | 0.00   | 0.00  | 0.06 |
| Sub032  | 3.18               | 1.20     | 0.40    | 0.33  | 0.48    | 23.87               | 17.07 | 274.83  | 0.01                         | 0.00      | 0.03    | 0.00   | 0.01  | 0.07 |
| Sub033  | 2.71               | 1.44     | 0.27    | 0.18  | 0.73    | 25.10               | 17.69 | 316.50  | 0.02                         | 0.00      | 0.01    | 0.00   | 0.01  | 0.07 |
| Sub034  | 5.61               | 1.71     | 0.68    | 0.62  | 0.33    | 25.24               | 16.39 | 180.78  | 0.01                         | 0.00      | 0.02    | 0.01   | 0.01  | 0.07 |
| Sub035  | 6.67               | 2.16     | 0.68    | 0.20  | 1.03    | 23.23               | 18.68 | 131.00  | 0.00                         | 0.00      | 0.02    | 0.01   | 0.02  | 0.09 |
| Sub036  | 3.96               | 1.30     | 0.00    | 0.56  | 0.74    | 25.14               | 18.80 | 328.00  | 0.00                         | 0.00      | 0.01    | 0.00   | 0.00  | 0.06 |
| Sub037  | 3.59               | 2.39     | 0.80    | 0.00  | 0.40    | 24.80               | 17.39 | 235.00  | 0.02                         | 0.00      | 0.04    | 0.01   | 0.00  | 0.07 |
| Sub038  | 0.78               | 2.20     | 0.00    | 1.64  | 0.00    | 23.56               | 15.80 | 125.50  | 0.01                         | 0.01      | 0.01    | 0.00   | 0.00  | 0.13 |
| Sub039  | 4.32               | 1.02     | 0.14    | 0.30  | 0.22    | 24.05               | 17.84 | 420.88  | 0.00                         | 0.00      | 0.02    | 0.01   | 0.01  | 0.08 |
| Sub040  | 3.15               | 0.93     | 0.58    | 0.00  | 0.00    | 27.25               | 16.64 | 167.50  | 0.01                         | 0.00      | 0.01    | 0.01   | 0.01  | 0.05 |
| Sub041  | 3.39               | 3.72     | 0.64    | 1.91  | 1.20    | 24.23               | 17.82 | 285.50  | 0.01                         | 0.01      | 0.02    | 0.01   | 0.01  | 0.08 |
| Sub042  | 3.32               | 1.43     | 0.31    | 0.47  | 0.55    | 24.16               | 17.73 | 550.00  | 0.01                         | 0.00      | 0.02    | 0.01   | 0.01  | 0.08 |
| Ctrl001 | 1.64               | 0.00     | 0.00    | 0.00  | 0.00    | 23.67               | 18.11 | 56.00   | 0.01                         | 0.00      | 0.02    | 0.00   | 0.02  | 0.05 |
| Ctrl002 | 2.94               | 0.98     | 0.00    | 0.00  | 0.00    | 24.86               | 17.12 | 95.00   | 0.01                         | 0.00      | 0.00    | 0.00   | 0.02  | 0.06 |
| Ctrl003 | 5.74               | 0.82     | 0.00    | 0.82  | 0.00    | 23.71               | 17.69 | 114.00  | 0.00                         | 0.00      | 0.01    | 0.00   | 0.03  | 0.08 |
| Ctrl004 | 3.53               | 1.18     | 0.00    | 0.00  | 0.00    | 24.69               | 17.85 | 84.00   | 0.00                         | 0.01      | 0.03    | 0.00   | 0.01  | 0.07 |
| Ctrl005 | 1.32               | 2.63     | 0.00    | 0.00  | 0.00    | 26.34               | 16.59 | 73.00   | 0.00                         | 0.00      | 0.01    | 0.00   | 0.02  | 0.05 |

|        |       |      |      |      |      |       |       |        |      |      |      |      |      |      |
|--------|-------|------|------|------|------|-------|-------|--------|------|------|------|------|------|------|
| Ctr006 | 2.68  | 0.00 | 0.00 | 0.00 | 0.00 | 24.68 | 19.60 | 106.00 | 0.00 | 0.00 | 0.01 | 0.00 | 0.03 | 0.05 |
| Ctr007 | 3.19  | 5.32 | 1.06 | 0.00 | 3.19 | 24.33 | 21.30 | 93.00  | 0.00 | 0.00 | 0.01 | 0.00 | 0.02 | 0.04 |
| Ctr008 | 2.11  | 1.05 | 0.00 | 1.05 | 0.00 | 22.98 | 19.52 | 93.00  | 0.01 | 0.00 | 0.03 | 0.00 | 0.01 | 0.08 |
| Ctr009 | 1.23  | 3.70 | 2.47 | 0.00 | 1.23 | 24.34 | 20.34 | 76.00  | 0.00 | 0.00 | 0.02 | 0.01 | 0.01 | 0.06 |
| Ctr010 | 4.35  | 1.74 | 0.00 | 0.00 | 0.87 | 25.85 | 16.78 | 121.00 | 0.01 | 0.00 | 0.02 | 0.01 | 0.02 | 0.07 |
| Ctr011 | 3.29  | 3.02 | 0.26 | 0.26 | 0.53 | 24.50 | 15.34 | 746.00 | 0.00 | 0.00 | 0.01 | 0.01 | 0.01 | 0.05 |
| Ctr012 | 1.05  | 5.79 | 0.00 | 0.53 | 4.74 | 24.11 | 14.29 | 189.00 | 0.00 | 0.00 | 0.02 | 0.01 | 0.01 | 0.06 |
| Ctr013 | 2.44  | 0.00 | 0.00 | 0.00 | 0.00 | 25.92 | 20.23 | 42.00  | 0.00 | 0.00 | 0.00 | 0.00 | 0.00 | 0.05 |
| Ctr014 | 5.68  | 1.14 | 1.14 | 1.14 | 0.00 | 23.57 | 18.66 | 85.00  | 0.01 | 0.00 | 0.01 | 0.01 | 0.01 | 0.11 |
| Ctr015 | 4.00  | 0.00 | 0.00 | 0.00 | 0.00 | 24.26 | 21.02 | 72.00  | 0.01 | 0.00 | 0.00 | 0.01 | 0.02 | 0.03 |
| Ctr016 | 10.53 | 0.00 | 0.00 | 0.00 | 0.00 | 25.29 | 20.92 | 53.00  | 0.00 | 0.00 | 0.01 | 0.00 | 0.00 | 0.03 |
| Ctr017 | 0.00  | 4.69 | 3.12 | 0.00 | 0.00 | 24.88 | 17.59 | 61.00  | 0.00 | 0.01 | 0.08 | 0.00 | 0.02 | 0.12 |
| Ctr018 | 3.05  | 2.29 | 0.00 | 0.00 | 2.29 | 23.14 | 19.94 | 132.00 | 0.00 | 0.01 | 0.01 | 0.00 | 0.00 | 0.06 |
| Ctr019 | 7.32  | 3.66 | 3.66 | 1.22 | 0.00 | 25.22 | 20.06 | 78.00  | 0.02 | 0.01 | 0.01 | 0.01 | 0.01 | 0.11 |
| Ctr020 | 2.15  | 1.08 | 1.08 | 0.00 | 0.00 | 24.54 | 14.21 | 85.00  | 0.01 | 0.00 | 0.03 | 0.01 | 0.01 | 0.03 |
| Ctr021 | 5.33  | 1.33 | 1.33 | 0.00 | 0.00 | 26.88 | 18.54 | 70.00  | 0.01 | 0.00 | 0.00 | 0.01 | 0.00 | 0.02 |
| Ctr022 | 6.67  | 0.00 | 0.00 | 0.00 | 0.00 | 22.71 | 18.71 | 57.00  | 0.05 | 0.01 | 0.01 | 0.00 | 0.00 | 0.05 |
| Ctr023 | 0.00  | 0.00 | 0.00 | 0.00 | 0.00 | 24.13 | 18.39 | 60.00  | 0.00 | 0.00 | 0.02 | 0.00 | 0.00 | 0.05 |
| Ctr024 | 15.07 | 0.00 | 0.00 | 0.00 | 0.00 | 24.11 | 20.43 | 73.00  | 0.01 | 0.00 | 0.00 | 0.01 | 0.02 | 0.12 |
| Ctr025 | 1.22  | 2.44 | 1.22 | 1.22 | 0.00 | 25.57 | 20.43 | 75.00  | 0.00 | 0.00 | 0.02 | 0.00 | 0.00 | 0.06 |
| Ctr026 | 4.00  | 4.00 | 3.00 | 0.00 | 0.00 | 24.45 | 18.03 | 95.00  | 0.01 | 0.00 | 0.01 | 0.00 | 0.01 | 0.07 |
| Ctr027 | 5.00  | 0.00 | 0.00 | 0.00 | 0.00 | 22.68 | 16.52 | 54.00  | 0.00 | 0.01 | 0.00 | 0.03 | 0.01 | 0.10 |
| Ctr028 | 4.60  | 0.00 | 0.00 | 0.00 | 0.00 | 22.94 | 19.73 | 81.00  | 0.00 | 0.00 | 0.05 | 0.04 | 0.00 | 0.07 |
| Ctr029 | 2.56  | 0.00 | 0.00 | 0.00 | 0.00 | 23.58 | 19.14 | 72.00  | 0.00 | 0.00 | 0.04 | 0.02 | 0.01 | 0.09 |
| Ctr030 | 5.06  | 0.00 | 0.00 | 0.00 | 0.00 | 25.07 | 19.65 | 75.00  | 0.00 | 0.00 | 0.00 | 0.00 | 0.01 | 0.07 |
| Ctr031 | 4.88  | 1.22 | 0.00 | 1.22 | 0.00 | 22.87 | 17.96 | 81.00  | 0.01 | 0.00 | 0.00 | 0.00 | 0.00 | 0.04 |

**Supplementary Table 02:** Psychometric evaluations of participants during the pandemic period of observation. PANSS psychometric scale is composed of 30 questions. graded of 1 to 7. each question. and subdivided into 3 sub-scales: positive symptoms. negative symptoms. and general symptoms. More details on Methods.

| ID     | Psychometric Evaluation |          |          |         | PANSS Negative Subscale |    |    |    |    |    |    |
|--------|-------------------------|----------|----------|---------|-------------------------|----|----|----|----|----|----|
|        | PANSS                   | Positive | Negative | General | N1                      | N2 | N3 | N4 | N5 | N6 | N7 |
| Sub001 | 49                      | 7        | 13       | 29      | 1                       | 1  | 1  | 4  | 1  | 2  | 3  |
| Sub002 | 34                      | 7        | 9        | 18      | 1                       | 1  | 1  | 1  | 1  | 1  | 3  |
| Sub003 | 79                      | 15       | 16       | 48      | 3                       | 3  | 2  | 2  | 1  | 1  | 4  |
| Sub004 | 42                      | 9        | 9        | 24      | 3                       | 1  | 1  | 1  | 1  | 1  | 1  |
| Sub005 | 71                      | 12       | 17       | 42      | 4                       | 4  | 1  | 3  | 1  | 1  | 3  |
| Sub006 | 36                      | 7        | 7        | 22      | 1                       | 1  | 1  | 1  | 1  | 1  | 1  |
| Sub007 | 74                      | 17       | 21       | 36      | 5                       | 5  | 2  | 4  | 1  | 1  | 3  |
| Sub008 | 71                      | 8        | 18       | 45      | 3                       | 2  | 2  | 4  | 1  | 2  | 4  |
| Sub009 | 48                      | 9        | 8        | 31      | 1                       | 1  | 1  | 1  | 1  | 1  | 2  |
| Sub010 |                         |          |          |         |                         |    |    |    |    |    |    |
| Sub011 | 50                      | 10       | 9        | 31      | 1                       | 1  | 1  | 1  | 1  | 1  | 3  |
| Sub012 | 47                      | 12       | 7        | 28      | 1                       | 1  | 1  | 1  | 1  | 1  | 1  |
| Sub013 | 50                      | 14       | 10       | 26      | 1                       | 1  | 1  | 2  | 1  | 1  | 3  |
| Sub014 | 69                      | 18       | 11       | 40      | 2                       | 2  | 1  | 2  | 1  | 1  | 2  |
| Sub015 | 70                      | 16       | 16       | 38      | 3                       | 3  | 2  | 2  | 1  | 2  | 3  |
| Sub016 | 40                      | 11       | 7        | 22      | 1                       | 1  | 1  | 1  | 1  | 1  | 1  |
| Sub017 | 43                      | 9        | 11       | 23      | 2                       | 2  | 2  | 1  | 1  | 2  | 1  |
| Sub018 | 58                      | 8        | 10       | 40      | 1                       | 1  | 1  | 2  | 1  | 1  | 3  |
| Sub019 | 71                      | 13       | 16       | 42      | 4                       | 2  | 1  | 3  | 1  | 1  | 4  |
| Sub020 | 56                      | 14       | 8        | 34      | 1                       | 1  | 1  | 1  | 2  | 1  | 1  |
| Sub021 | 50                      | 10       | 11       | 29      | 1                       | 1  | 2  | 1  | 1  | 1  | 4  |
| Sub022 | 60                      | 12       | 15       | 33      | 3                       | 1  | 2  | 3  | 1  | 2  | 3  |
| Sub023 | 50                      | 15       | 10       | 25      | 1                       | 2  | 1  | 3  | 1  | 1  | 1  |
| Sub024 | 44                      | 8        | 9        | 27      | 1                       | 1  | 1  | 1  | 1  | 1  | 3  |
| Sub025 | 41                      | 7        | 10       | 24      | 1                       | 1  | 1  | 1  | 1  | 1  | 4  |
| Sub026 | 34                      | 8        | 7        | 19      | 1                       | 1  | 1  | 1  | 1  | 1  | 1  |
| Sub027 | 58                      | 13       | 16       | 29      | 1                       | 4  | 2  | 3  | 1  | 2  | 3  |
| Sub028 | 35                      | 7        | 12       | 16      | 1                       | 2  | 1  | 3  | 3  | 1  | 1  |
| Sub029 |                         |          |          |         |                         |    |    |    |    |    |    |
| Sub030 | 42                      | 9        | 10       | 23      | 1                       | 1  | 1  | 1  | 1  | 1  | 4  |
| Sub031 | 50                      | 11       | 14       | 25      | 2                       | 3  | 2  | 1  | 1  | 2  | 3  |
| Sub032 | 57                      | 10       | 10       | 37      | 1                       | 1  | 1  | 1  | 1  | 1  | 4  |
| Sub033 | 51                      | 11       | 13       | 27      | 3                       | 3  | 1  | 1  | 1  | 1  | 3  |
| Sub034 | 75                      | 19       | 11       | 45      | 1                       | 1  | 1  | 1  | 1  | 1  | 5  |
| Sub035 | 36                      | 9        | 7        | 20      | 1                       | 1  | 1  | 1  | 1  | 1  | 1  |
| Sub036 | 52                      | 13       | 8        | 31      | 1                       | 2  | 1  | 1  | 1  | 1  | 1  |
| Sub037 |                         |          |          |         |                         |    |    |    |    |    |    |
| Sub038 | 57                      | 7        | 15       | 35      | 1                       | 4  | 2  | 2  | 1  | 1  | 4  |
| Sub039 | 69                      | 10       | 16       | 43      | 2                       | 3  | 2  | 3  | 1  | 1  | 4  |
| Sub040 | 54                      | 17       | 9        | 28      | 1                       | 2  | 1  | 2  | 1  | 1  | 1  |
| Sub041 | 83                      | 17       | 19       | 47      | 2                       | 3  | 2  | 4  | 1  | 2  | 5  |
| Sub042 | 66                      | 15       | 10       | 41      | 1                       | 1  | 1  | 1  | 1  | 1  | 4  |

**Supplementary Table 03:** Self-evaluation of dream observation experience during the first month of social isolation. The participants were requested to grade from 1 to 10 how much do they feel after the experience of dream observation. Details on Methods.

| ID     | Dream Observation Self-evaluation Scale |     |      |         |           |       |          |            |            |         |          |          |
|--------|-----------------------------------------|-----|------|---------|-----------|-------|----------|------------|------------|---------|----------|----------|
|        | Happy                                   | Sad | Calm | Anxious | Energetic | Tired | Peaceful | Aggressive | Altruistic | Selfish | Creative | Confused |
| Sub001 | 3                                       | 8   | 3    | 7       | 3         | 6     | 4        | 5          | 6          | 2       | 6        | 7        |
| Sub002 | 5                                       | 1   | 1    | 1       | 1         | 1     | 1        | 1          | 1          | 1       | 1        | 1        |
| Sub003 |                                         |     |      |         |           |       |          |            |            |         |          |          |
| Sub004 | 6                                       | 1   | 1    | 3       | 1         | 1     | 6        | 1          | 1          | 1       | 3        | 1        |
| Sub005 | 8                                       | 2   | 5    | 4       | 6         | 3     | 7        | 2          | 5          | 2       | 8        | 3        |
| Sub006 | 10                                      | 1   | 8    | 1       | 7         | 2     | 9        | 1          | 7          | 1       | 7        | 4        |
| Sub007 | 8                                       | 2   | 5    | 6       | 5         | 5     | 5        | 5          | 5          | 5       | 8        | 5        |
| Sub008 | 10                                      | 1   | 1    | 10      | 10        | 1     | 10       | 1          | 10         | 1       | 10       | 1        |
| Sub009 | 9                                       | 1   | 1    | 6       | 1         | 1     | 1        | 1          | 1          | 1       | 5        | 6        |
| Sub010 | 5                                       | 5   | 5    | 5       | 5         | 5     | 5        | 5          | 5          | 5       | 5        | 7        |
| Sub011 | 7                                       | 8   | 5    | 7       | 5         | 7     | 8        | 3          | 7          | 2       | 7        | 4        |
| Sub012 | 5                                       | 1   | 1    | 1       | 1         | 1     | 1        | 1          | 1          | 1       | 7        | 8        |
| Sub013 | 5                                       | 8   | 5    | 6       | 4         | 5     | 5        | 5          | 5          | 5       | 5        | 7        |
| Sub014 | 9                                       | 2   | 9    | 2       | 9         | 2     | 8        | 2          | 8          | 2       | 8        | 6        |
| Sub015 | 8                                       | 2   | 1    | 8       | 1         | 1     | 1        | 1          | 1          | 5       | 1        | 3        |
| Sub016 |                                         |     |      |         |           |       |          |            |            |         |          |          |
| Sub017 | 9                                       | 3   | 5    | 5       | 5         | 5     | 6        | 4          | 5          | 5       | 9        | 2        |
| Sub018 | 6                                       | 6   | 5    | 8       | 5         | 5     | 5        | 3          | 3          | 3       | 3        | 3        |
| Sub019 | 9                                       | 4   | 3    | 7       | 8         | 1     | 1        | 1          | 5          | 3       | 8        | 5        |
| Sub020 | 4                                       | 6   | 1    | 10      | 10        | 1     | 1        | 1          | 2          | 8       | 10       | 10       |
| Sub021 | 10                                      | 1   | 9    | 1       | 9         | 1     | 9        | 1          | 9          | 1       | 10       | 1        |
| Sub022 | 10                                      | 1   | 7    | 1       | 8         | 1     | 5        | 5          | 5          | 5       | 9        | 8        |
| Sub023 | 7                                       | 3   | 7    | 1       | 7         | 8     | 1        | 1          | 7          | 1       | 7        | 1        |
| Sub024 | 10                                      | 2   | 7    | 4       | 5         | 5     | 7        | 1          | 8          | 1       | 8        | 3        |
| Sub025 | 8                                       | 1   | 5    | 1       | 5         | 1     | 5        | 1          | 6          | 1       | 5        | 1        |
| Sub026 | 10                                      | 1   | 9    | 1       | 10        | 1     | 9        | 1          | 8          | 2       | 10       | 1        |
| Sub027 |                                         |     |      |         |           |       |          |            |            |         |          |          |
| Sub028 | 9                                       | 1   | 9    | 1       | 9         | 1     | 10       | 1          | 10         | 1       | 9        | 3        |
| Sub029 |                                         |     |      |         |           |       |          |            |            |         |          |          |
| Sub030 | 8                                       | 1   | 5    | 1       | 5         | 6     | 7        | 1          | 5          | 1       | 7        | 1        |
| Sub031 | 9                                       | 1   | 3    | 3       | 3         | 5     | 3        | 1          | 1          | 1       | 5        | 7        |
| Sub032 | 9                                       | 1   | 5    | 8       | 1         | 1     | 1        | 1          | 5          | 1       | 8        | 8        |
| Sub033 | 8                                       | 1   | 1    | 7       | 1         | 1     | 1        | 1          | 1          | 1       | 5        | 5        |
| Sub034 | 10                                      | 1   | 8    | 2       | 9         | 2     | 10       | 1          | 10         | 1       | 10       | 1        |
| Sub035 | 8                                       | 3   | 8    | 3       | 9         | 2     | 9        | 1          | 9          | 1       | 10       | 3        |
| Sub036 | 8                                       | 2   | 5    | 2       | 5         | 1     | 1        | 1          | 1          | 1       | 5        | 1        |
| Sub037 |                                         |     |      |         |           |       |          |            |            |         |          |          |
| Sub038 | 7                                       | 3   | 7    | 3       | 7         | 3     | 8        | 1          | 5          | 5       | 7        | 3        |
| Sub039 | 9                                       | 3   | 7    | 3       | 7         | 1     | 8        | 1          | 7          | 1       | 8        | 7        |
| Sub040 | 10                                      | 1   | 8    | 1       | 6         | 1     | 7        | 1          | 8          | 1       | 6        | 2        |
| Sub041 | 8                                       | 8   | 5    | 7       | 9         | 1     | 1        | 1          | 5          | 1       | 4        | 9        |
| Sub042 | 9                                       | 1   | 9    | 2       | 10        | 1     | 9        | 1          | 10         | 1       | 10       | 1        |
